# Supplementary material for: Clinical and Product Features Associated with Outcome of DLBCL Patients to CD19-Targeted CAR T-Cell Therapy
Source: MDPI journal article supplement (doi:10.3390/cancers13174279), 2021-08-25
Supplement: s1 [file s1]

## Article

# Clinical and Product Features Associated with Outcome of DLBCL Patients to CD19-Targeted CAR T-Cell Therapy

Sylvain Lamure, François Van Laethem, Delphine De Verbizier, Claire Lozano, Eve Gehlkopf, Jean-Jacques Tudesq, Chris Serrand, Mehdi Benzaoui, Tarik Kanouni, Adeline Quintard, John De Vos, Emmanuelle Tchernonog, Laura Platon, Xavier Ayrignac, Patrice Ceballos, Anne Sirvent, Mickael François, Hanane Guedon, Philippe Quittet, Cedric Mongellaz, Aurélie Conte, Charles Herbaux, Caroline Bret, Naomi Taylor, Valérie Dardalhon and Guillaume Cartron

**Table S1.** Antibodies/detection reagents used for multiparametric flow cytometry analyses.

| Antigen                                                  | Fluorochrome        | Clone                             | Company                |
|----------------------------------------------------------|---------------------|-----------------------------------|------------------------|
| <b>Apheresis</b>                                         |                     |                                   |                        |
| Tetrachrome                                              |                     |                                   | Beckman Coulter        |
| CD45                                                     | FITC                | B3821F4A                          |                        |
| CD4                                                      | RD1                 | SFC112T4D11                       |                        |
| CD8                                                      | ECD                 | SFC121Thy2D3                      |                        |
| CD3                                                      | PC5                 | UCHT1                             |                        |
| CD16                                                     | PC7                 | 3G8                               | Beckman Coulter        |
| CD56                                                     | PC7                 | N901                              | Beckman Coulter        |
| CD19                                                     | APC-A700            | J3-119                            | Beckman Coulter        |
| HLADR                                                    | PB                  | Immu-357                          | Beckman Coulter        |
| <b>LUCID DURACLONE Dry reagent</b>                       |                     |                                   | Beckman Coulter        |
| CD31                                                     | FITC                | 5.6E                              |                        |
| CD197(CCR7)                                              | PE                  | G043H7                            |                        |
| CD45RA                                                   | ECD                 | 2H4                               |                        |
| CD25                                                     | PC5.5               | B1,49,9                           |                        |
| CD45RO                                                   | PC7                 | UCHL1                             |                        |
| CD127                                                    | APC                 | R34.34                            |                        |
| CD8                                                      | APC-A700            | B9.11                             |                        |
| CD3                                                      | APC-A750            | UCHT1                             |                        |
| CD4                                                      | PB                  | 13B8.2                            |                        |
| CD45                                                     | KRO                 | J33                               |                        |
| <b>CAR-T cell final product (bag)</b>                    |                     |                                   |                        |
| CD19 CAR detection reagent                               |                     | Cat# 130-115-965                  | Miltenyi Biotec        |
| Streptavidin                                             | PC7                 |                                   | Becton Dickinson       |
| CD4                                                      | BD Horizon V450     | Cat# 560345, RRID:AB_1645572      | Becton Dickinson       |
| CD8                                                      | APC Alexa eFluor780 | Cat# 47-0088-41, RRID:AB_1272116  | ThermoFisherScientific |
| CD45RA                                                   | BV711               | Cat# 563733, RRID:AB_2738392      | Becton Dickinson       |
| CD45RO                                                   | BV650               | Cat# 563749, RRID:AB_2744412      | Becton Dickinson       |
| CCR7                                                     | APC                 | Cat# 130-120-606, RRID:AB_2784048 | Miltenyi Biotec        |
| <b>Expansion of CAR+ T cells in the peripheral blood</b> |                     |                                   |                        |
| CD19 CAR detection reagent                               |                     | Cat# 130-115-965                  | Miltenyi Biotec        |
| Anti-Biotin                                              | PE                  | Cat# 130-110-951, REA746          | Miltenyi Biotec        |
| CD45                                                     | BV605               | Cat# 564047, HI30                 | Becton Dickinson       |
| CD3                                                      | BV510               | Cat# 566779, OKT3                 | Becton Dickinson       |
| CD4                                                      | APC R700            | Cat# 564975, RPA-T4               | Becton Dickinson       |
| CD8                                                      | APC H7              | Cat# 641400, SK1                  | Becton Dickinson       |
| PD-1                                                     | BV421               | Cat# 562516, EH12.1               | Becton Dickinson       |
| LAG3                                                     | FITC                | Cat# 369308, 11C3C65              | Biolegend              |
| Tim3                                                     | PerCp Cy 5.5        | Cat# 345016, F38-2 <sup>E</sup> 2 | Biolegend              |

**Table S2.** Univariate analysis of factors associated with PFS after CAR T-cells therapy.

|                                                       | HR (IC95%)          | p-value |
|-------------------------------------------------------|---------------------|---------|
| <b><i>Demography and lymphoma characteristics</i></b> |                     |         |
| Age                                                   | 0.99 (0.97-1.01)    | 0.4109  |
| Gender (Female vs. Male)                              | 0.32 (0.15-0.70)    | 0.0039  |
| High-grade B-Lymphoma vs DLBCL                        | 0.60 (0.21-1.71)    | 0.3409  |
| t-FL vs DLBCL                                         | 0.89 (0.34-2.29)    | 0.7735  |
| Bridging chemotherapy                                 | 1.77 (0.54-5.78)    | 0.3451  |
| Number of treatment lines                             | 1.26 (0.62-2.54)    | 0.5235  |
| <b><i>Characteristics at infusion</i></b>             |                     |         |
| TMTV                                                  | 1.009 (1.001-1.016) | 0.0222  |
| Deauville scale                                       | 1.28 (0.78-2.09)    | 0.3254  |
| Ann Arbor stage                                       | 1.51 (1.12-2.03)    | 0.0062  |
| PS                                                    | 1.47 (1.00-2.01)    | 0.0501  |
| LDH                                                   | 1.002 (1.001-1.004) | 0.0002  |
| aaIPI                                                 | 2.11 (1.46-3.07)    | <0.0001 |
| CAR T-cells product (tisa-cel vs. Axi-cel)            | 2.34 (1.10-4.96)    | 0.0273  |
| <b><i>Apheresis composition</i></b>                   |                     |         |
| Total number of mononucleated cells                   | 0.94 (0.86-1.04)    | 0.2473  |
| Total number of CD3                                   | 0.90 (0.74-1.10)    | 0.3220  |
| %CD4 total                                            | 1.00 (0.98-1.02)    | 0.7875  |
| %CD4 naive                                            | 1.00 (0.97-1.03)    | 0.8002  |
| %CD4 naive 31 <sup>+</sup>                            | 1.00 (0.97-1.03)    | 0.9643  |
| %CD4 memory                                           | 1.00 (0.97-1.02)    | 0.8389  |
| %CD4 T regulatory                                     | 0.95 (0.89-1.02)    | 0.1451  |
| %CD8 total                                            | 1.00 (0.98-1.02)    | 0.9775  |
| %CD8 naive                                            | 1.01 (0.97-1.02)    | 0.7666  |
| %CD8 central memory                                   | 1.01 (0.97-1.01)    | 0.6268  |
| %CD8 effector memory                                  | 0.99 (0.97-1.01)    | 0.1696  |
| %CD8 EMRA                                             | 1.01 (0.99-1.03)    | 0.2184  |
| %NK                                                   | 0.99 (0.99-1.03)    | 0.4148  |

Abbreviations: CI Confidence Interval, DLBCL Diffuse Large B Cell Lymphoma, t-FL transformed Follicular Lymphoma, TMTV Total Metabolic Tumor Volume, PS *Performans Status*, LDH Lactate Dehydrogenase, aaIPI age adjusted international prognostic index, CAR T cell Chimeric Antigen Receptor T cell, EMRA Effector Memory expressing CD45RA.

**Table S3.** Baseline characteristics of patients according to the year of treatment.

|                                                                                                                                                                                                                                                                                 | Year 1<br>(n=30) | Year 2<br>(n=30) | p-value |
|---------------------------------------------------------------------------------------------------------------------------------------------------------------------------------------------------------------------------------------------------------------------------------|------------------|------------------|---------|
| <b>Demographic characteristics</b>                                                                                                                                                                                                                                              |                  |                  |         |
| Age, years                                                                                                                                                                                                                                                                      |                  |                  |         |
| Median (range)                                                                                                                                                                                                                                                                  | 60 (47-66)       | 69 (39-73)       | 0.03    |
| ≥70, n (%)                                                                                                                                                                                                                                                                      | 3 (10)           | 15 (50)          | <0.01   |
| <b>Male gender, n (%)</b>                                                                                                                                                                                                                                                       | 21 (70)          | 17 (57)          | 0.07    |
| <b>Lymphoma characteristics n (%)</b>                                                                                                                                                                                                                                           |                  |                  |         |
| Histology                                                                                                                                                                                                                                                                       |                  |                  |         |
| DLBCL                                                                                                                                                                                                                                                                           | 21 (70)          | 22 (74)          | <0.01   |
| t-FL                                                                                                                                                                                                                                                                            | 6 (20)           | 4 (13)           | 0.25    |
| High grade DLBCL                                                                                                                                                                                                                                                                | 3 (10)           | 4 (13)           | 0.65    |
| Number of previous line therapy                                                                                                                                                                                                                                                 |                  |                  | <0.01   |
| ≤2 lines                                                                                                                                                                                                                                                                        | 17 (57)          | 27 (90)          |         |
| >3 lines or more                                                                                                                                                                                                                                                                | 13 (43)          | 3 (10)           |         |
| Autologous SCT                                                                                                                                                                                                                                                                  | 6 (20)           | 6 (20)           | 1       |
| Bridging therapy, n (%)                                                                                                                                                                                                                                                         | 27 (90)          | 27 (90)          | 1       |
| <b>Characteristics at infusion</b>                                                                                                                                                                                                                                              |                  |                  |         |
| Ann Arbor Staging, n (%)                                                                                                                                                                                                                                                        |                  |                  |         |
| No measurable disease                                                                                                                                                                                                                                                           | 1 (3)            | 5 (17)           | <0.01   |
| I/II                                                                                                                                                                                                                                                                            | 5 (17)           | 13 (43)          | <0.01   |
| III/IV                                                                                                                                                                                                                                                                          | 24 (80)          | 12 (40)          | 0.18    |
| LDH > normal limit, n (%)                                                                                                                                                                                                                                                       | 14 (47)          | 11 (37)          | 0.20    |
| PS 3-4, n (%)                                                                                                                                                                                                                                                                   | 4 (13)           | 1 (3)            | 0.02    |
| Time between apheresis and infusion (days)                                                                                                                                                                                                                                      | 41 (34-70)       | 39 (30-174)      | 0.95    |
| aaIPI, n (%)                                                                                                                                                                                                                                                                    |                  |                  |         |
| Low                                                                                                                                                                                                                                                                             | 3 (10)           | 13 (43)          | <0.01   |
| Intermediate-1                                                                                                                                                                                                                                                                  | 14 (47)          | 10 (33)          | 0.06    |
| Intermediate-2                                                                                                                                                                                                                                                                  | 11 (37)          | 6 (20)           | 0.01    |
| High                                                                                                                                                                                                                                                                            | 2 (7)            | 1 (3)            | 0.33    |
| Abbreviations: DLBCL Diffuse Large B Cell Lymphoma, t-FL transformed Follicular Lymphoma, LDH Lactate Dehydrogenase, PS <i>Performans Status</i> , CAR T-cell Chimeric Antigen Receptor T-cell, SCT Stem Cell Transplantation, aaIPI age adjusted International Prognosis Index |                  |                  |         |

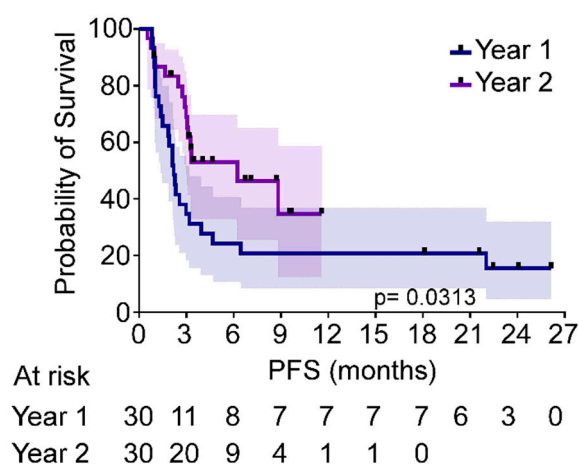

**Figure S1.** Progression free survival after CAR T-cell therapy as a function of the period of treatment. Progression Free Survival (PFS) of patients treated during the 1<sup>st</sup> and 2<sup>nd</sup> year of CAR T-cell activity at the CHU of Montpellier (n:30 per year). Response to treatment was analyzed via logistic regression; and time to death and time to progression were analyzed via univariate Cox proportional hazards models; p-value were calculated using a Wilcoxon Mann Whitney test.

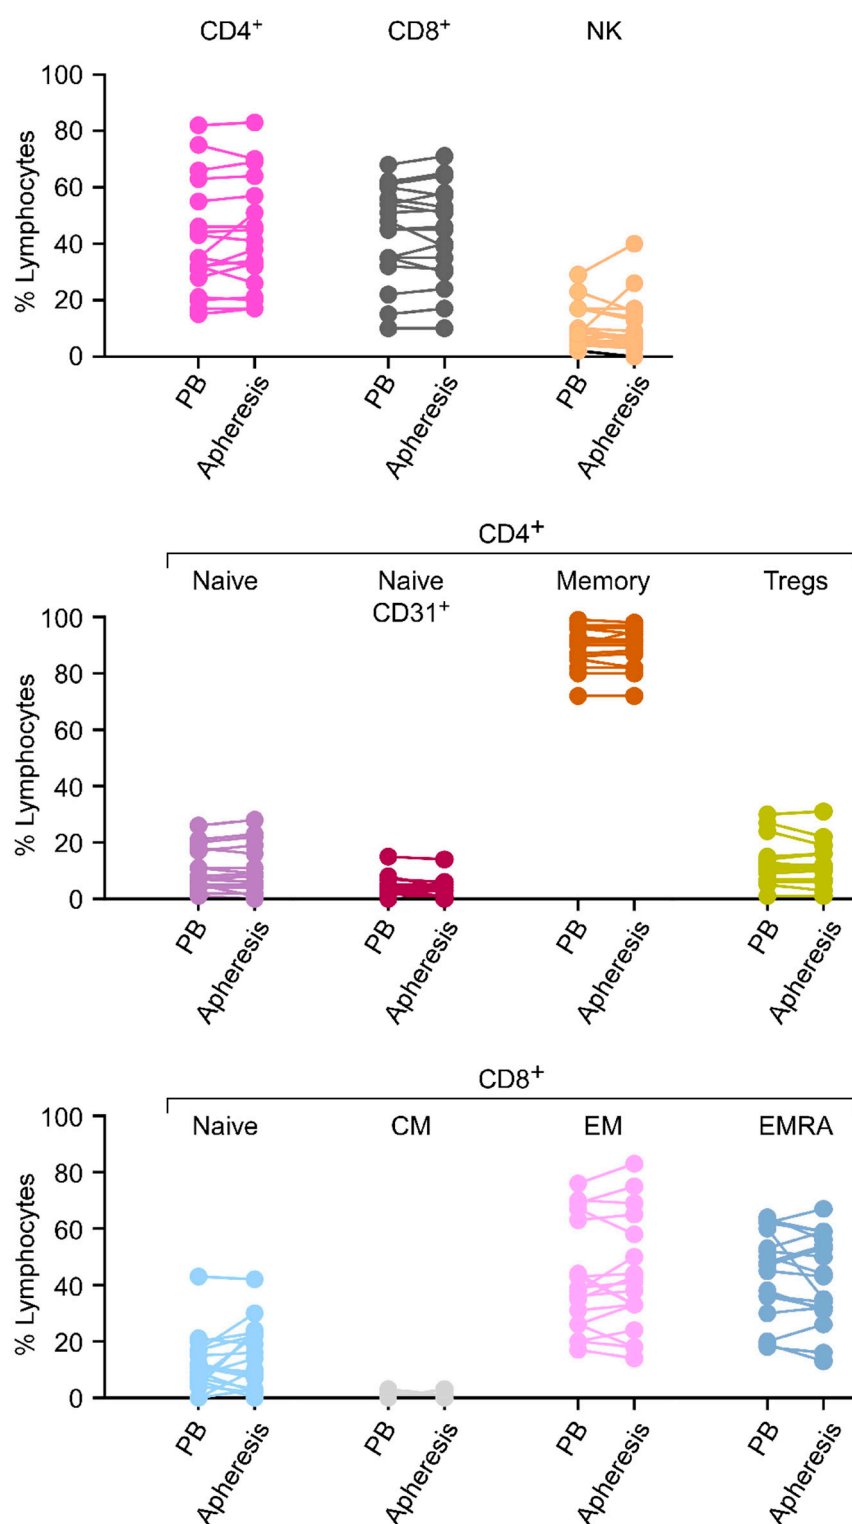

**Figure S2.** Comparison of T-cell subsets in peripheral blood and apheresis products of patients prior to CAR-T cell therapy. Comparison of the percentages of CD4<sup>+</sup>, CD8<sup>+</sup> and NK cells (left) as well as T-cell subsets (Naive, Naive CD31<sup>+</sup>, Memory, Treg) in peripheral blood (PB) and apheresis products of patients prior to CAR T-cell therapy (n:18), as evaluated by flow cytometry. p-values were calculated using Mann Whitney tests and no significant differences were detected.

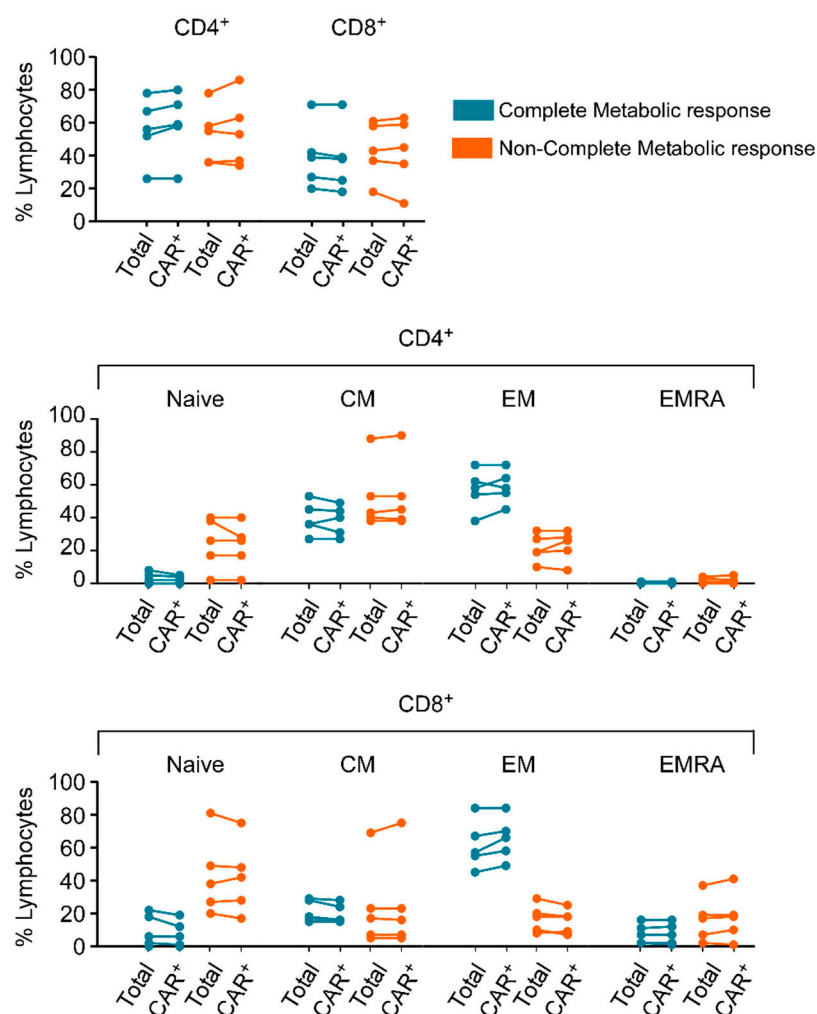

**Figure S3.** Comparison of the phenotype of all T-cells and the CAR<sup>+</sup> subset in the commercial product as a function of clinical outcome. Percentages of CD4<sup>+</sup> and CD8<sup>+</sup> T-cells in the total commercial product as well as the CAR<sup>+</sup> subset are presented for patients with a CMR (blue, n = 5) as compared to a non-complete response (orange, n = 5, left). CD4<sup>+</sup> and CD8<sup>+</sup> T-cell subsets phenotyped as naive, CM, EM, EMRA were evaluated in the total commercial product as well as the CAR<sup>+</sup> subset as a function of clinical response. p-values were calculated using Mann Whitney tests and no significant differences were detected.

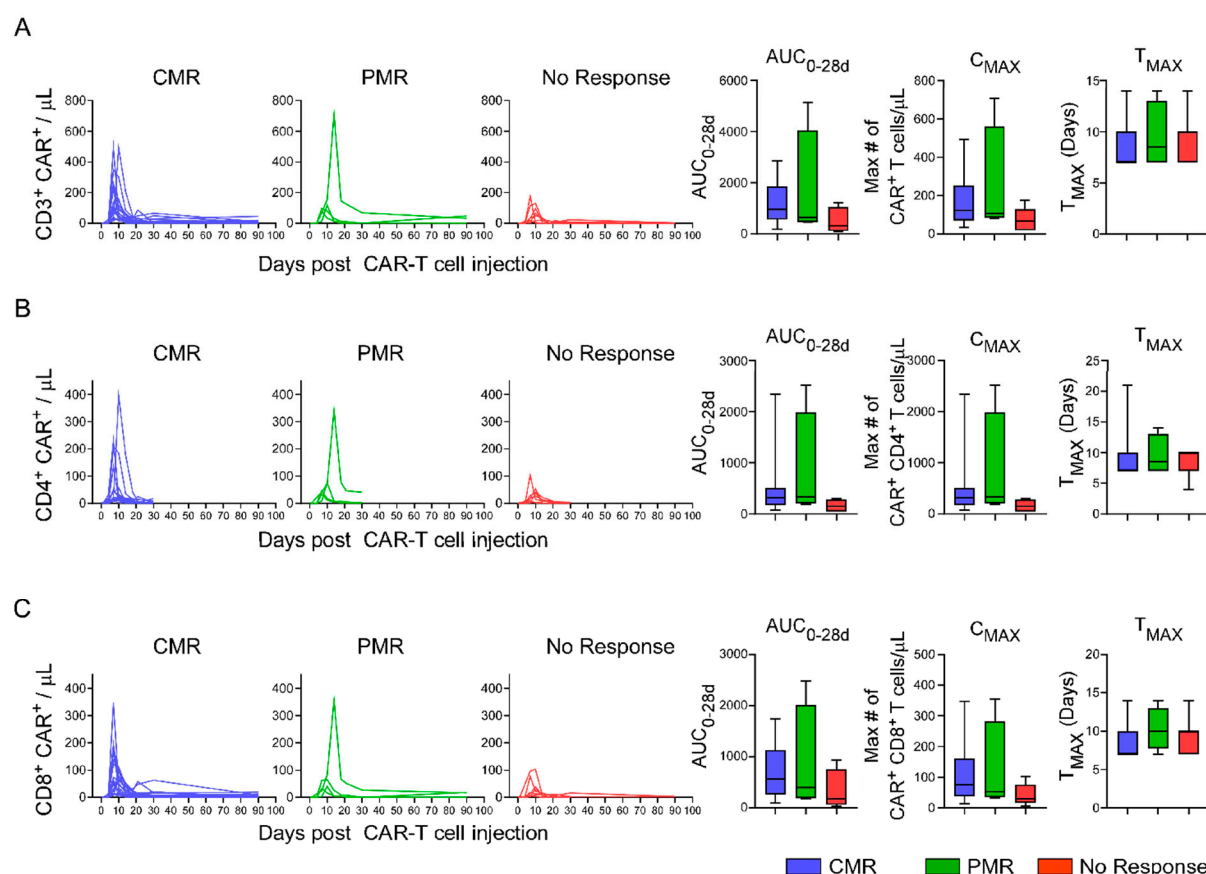

**Figure S4.** In vivo monitoring of the absolute number of CAR<sup>+</sup> T-cells following CAR T-cell therapy. **(A)** The absolute number of CAR<sup>+</sup> T-cells was monitored in the peripheral blood of 27 patients by flow cytometry at the indicated time points. Data are presented as a function of the clinical response; CMR, PMR, and no response (left graphs). Area under the curve (AUC<sub>0-28</sub>), representing the absolute number of CAR<sup>+</sup> T-cells between days 0 and day 28 following CAR<sup>+</sup> T infusion, maximal concentration post-infusion (C<sub>MAX</sub>) and time to maximal concentration (T<sub>MAX</sub>) and their median, IQR and range (n:27) are presented. Similar analyses were performed for absolute numbers of CD4<sup>+</sup>CAR<sup>+</sup> **(B)** and CD8<sup>+</sup>CAR<sup>+</sup> **(C)** T cells. Note that patients with incomplete kinetics were not included in the AUC evaluation. p-values were calculated using Mann Whitney tests and no significant differences were detected.

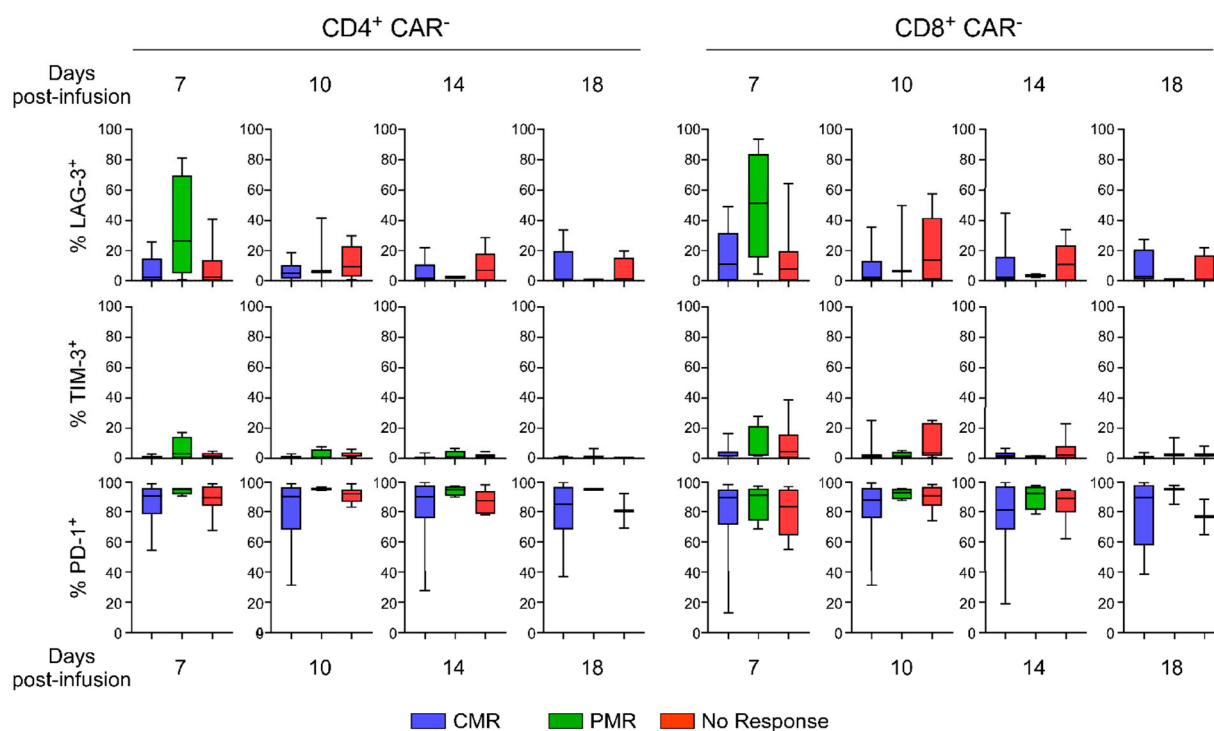

**Figure S5.** Evaluation of the exhaustion phenotype of CAR<sup>-</sup> T-cells as a function of clinical outcome. Exhaustion of CD4<sup>+</sup>CAR<sup>-</sup> (left) and CD8<sup>+</sup>CAR<sup>-</sup> (right) T-cells was evaluated from days 7 to 18 following CAR T infusion as a function of LAG3 (A) TIM-3 (B) and PD-1 (C) expression. Expression was assessed in patients with a CMR (n = 13), PMR (n = 4), and no response (n = 6) and their median, IQR and range are presented. p-values were calculated using Mann Whitney tests and no significant differences were detected.
